# Supplementary material
Source: ML conference proceedings conference paper supplement (https://openreview.net/forum?id=uHLDkQVtyC)

Index = 4

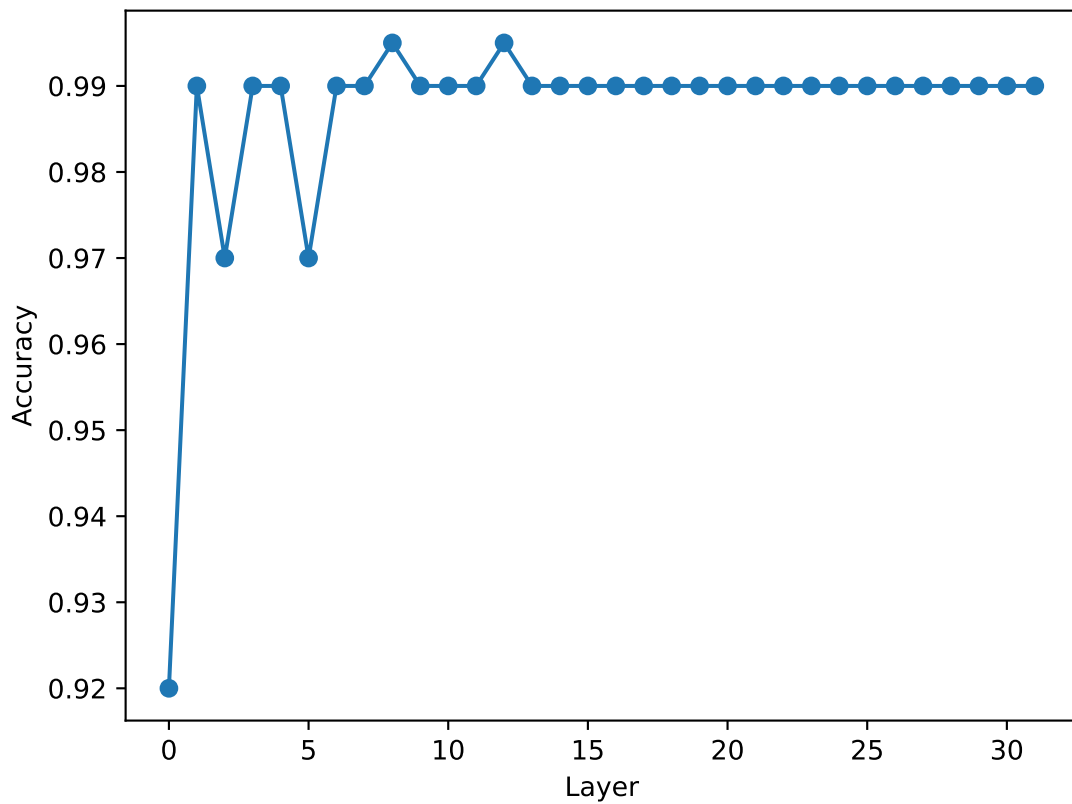

Supplement: supplementary_material [file attachment]

Index = 0

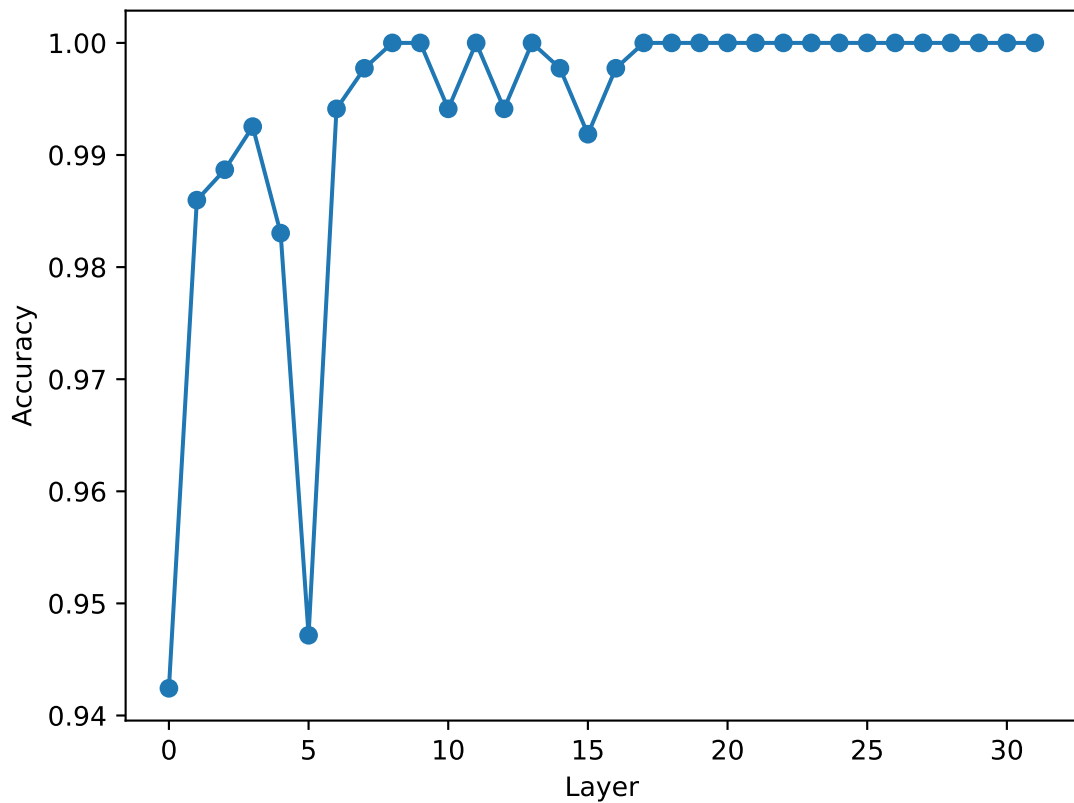

Supplement: supplementary_material [file attachment]

Number of few shot examples = 0

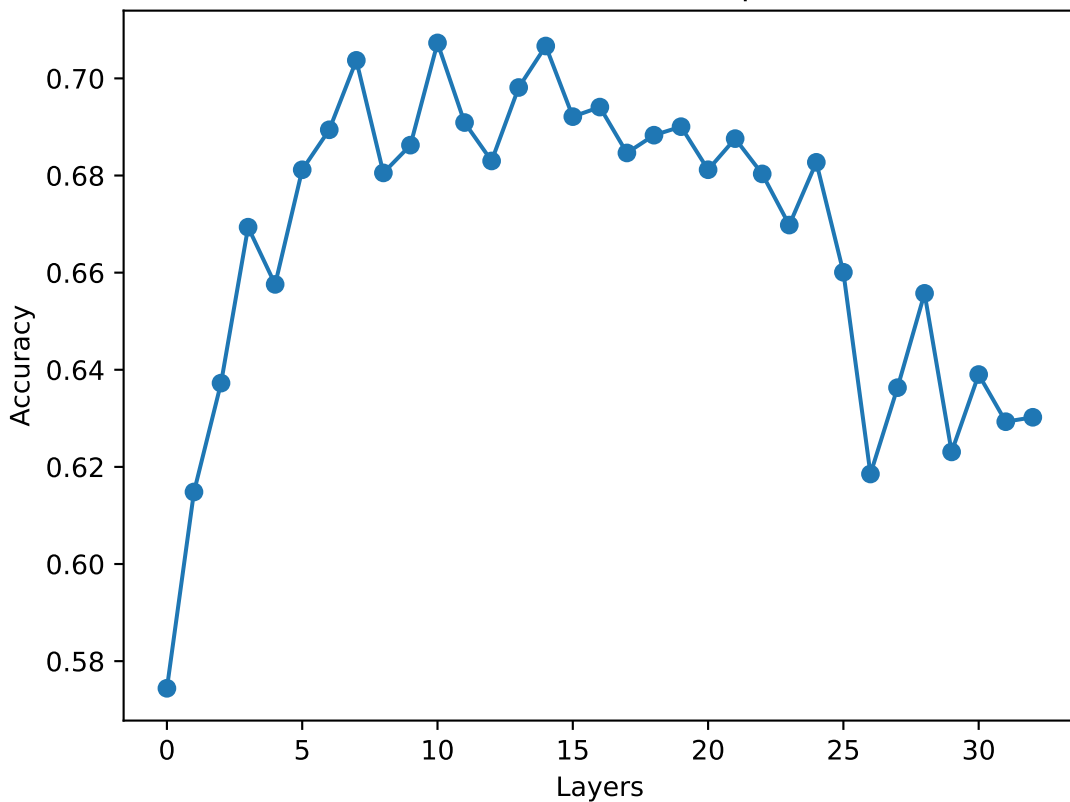

Supplement: supplementary_material [file attachment]

Index = 3

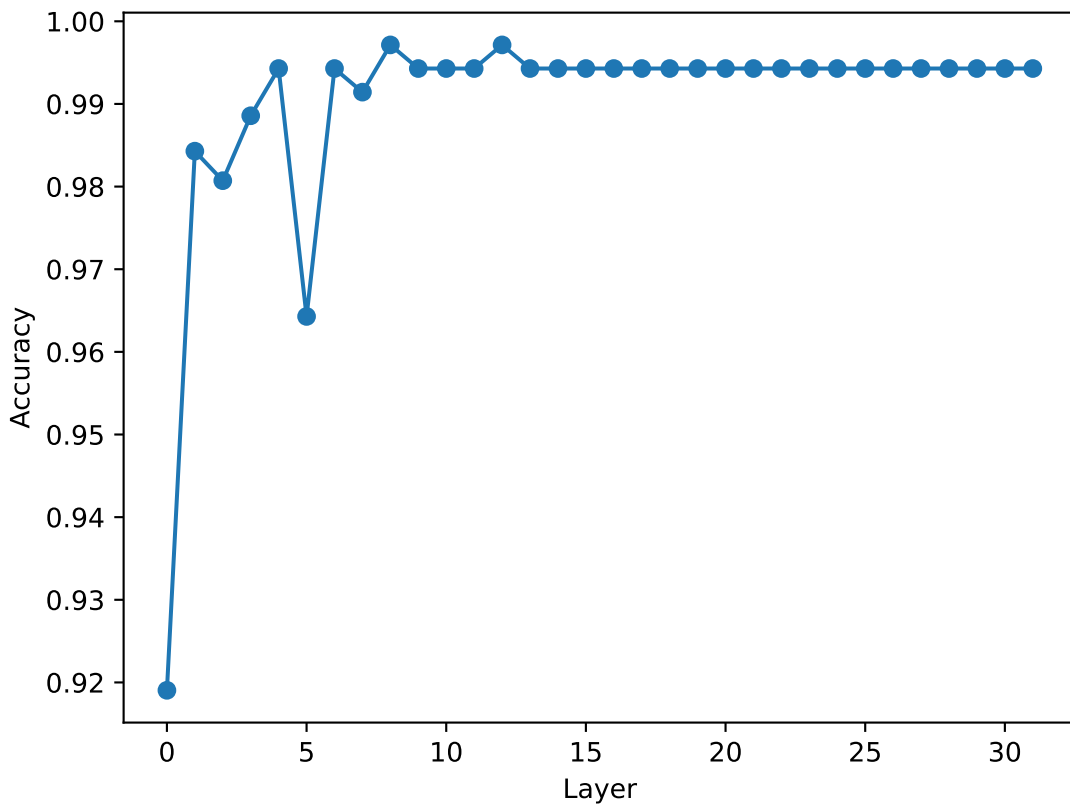

Supplement: supplementary_material [file attachment]

Index = 2

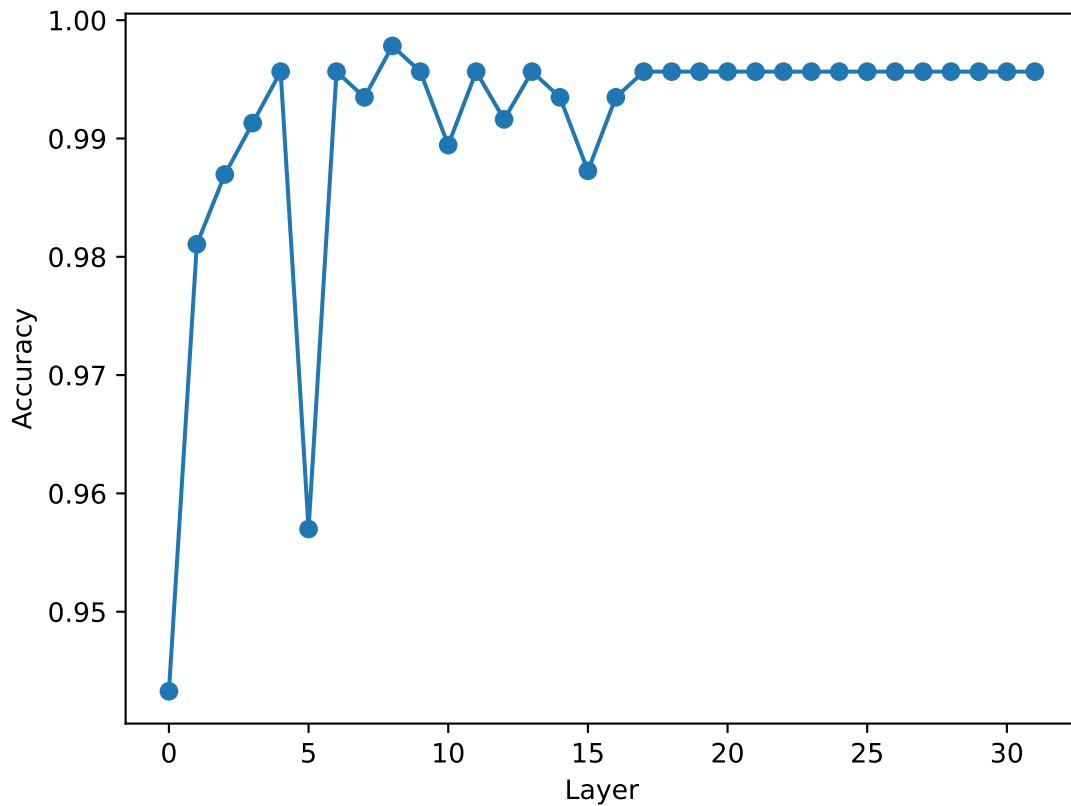

Supplement: supplementary_material [file attachment]

Index = 1

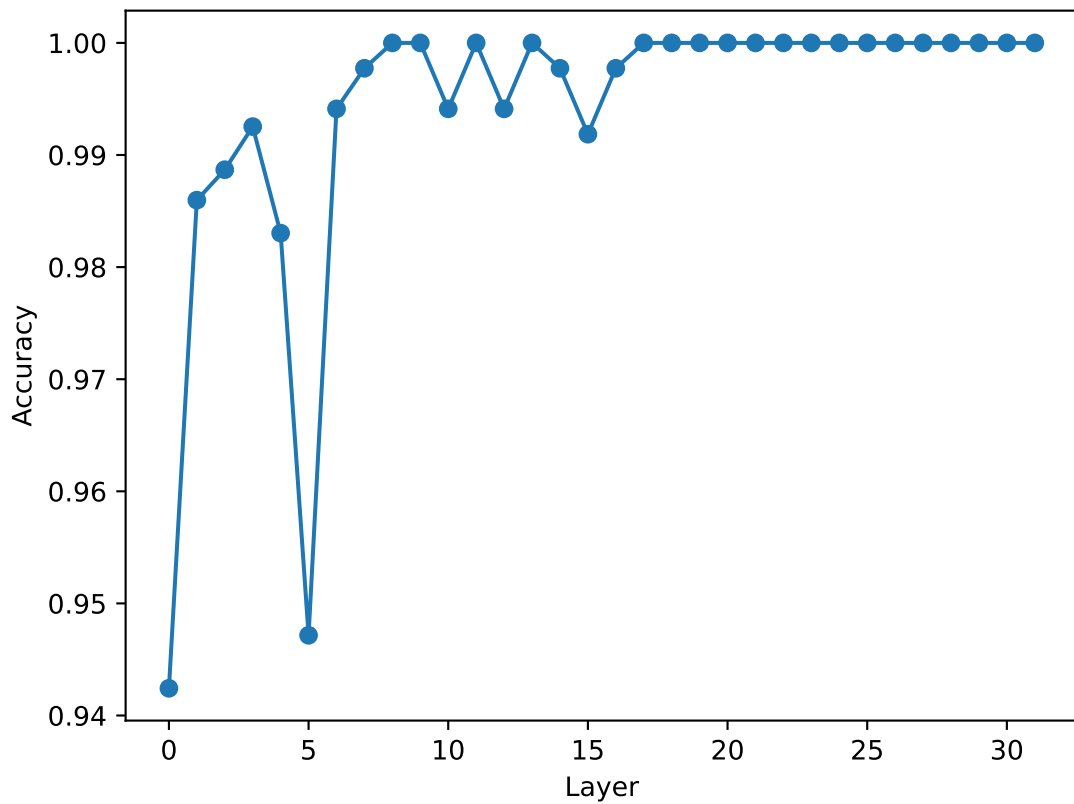

Supplement: supplementary_material [file attachment]

Number of few shot examples = 3

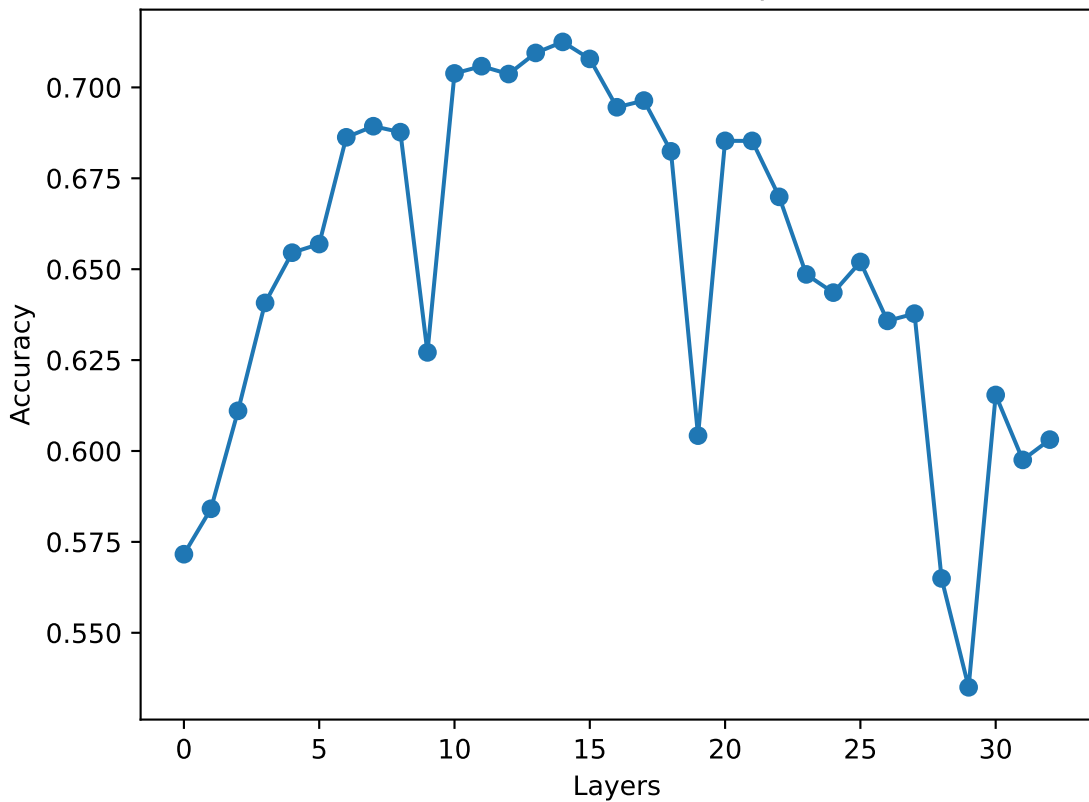

Supplement: supplementary_material [file attachment]

Number of few shot examples = 1

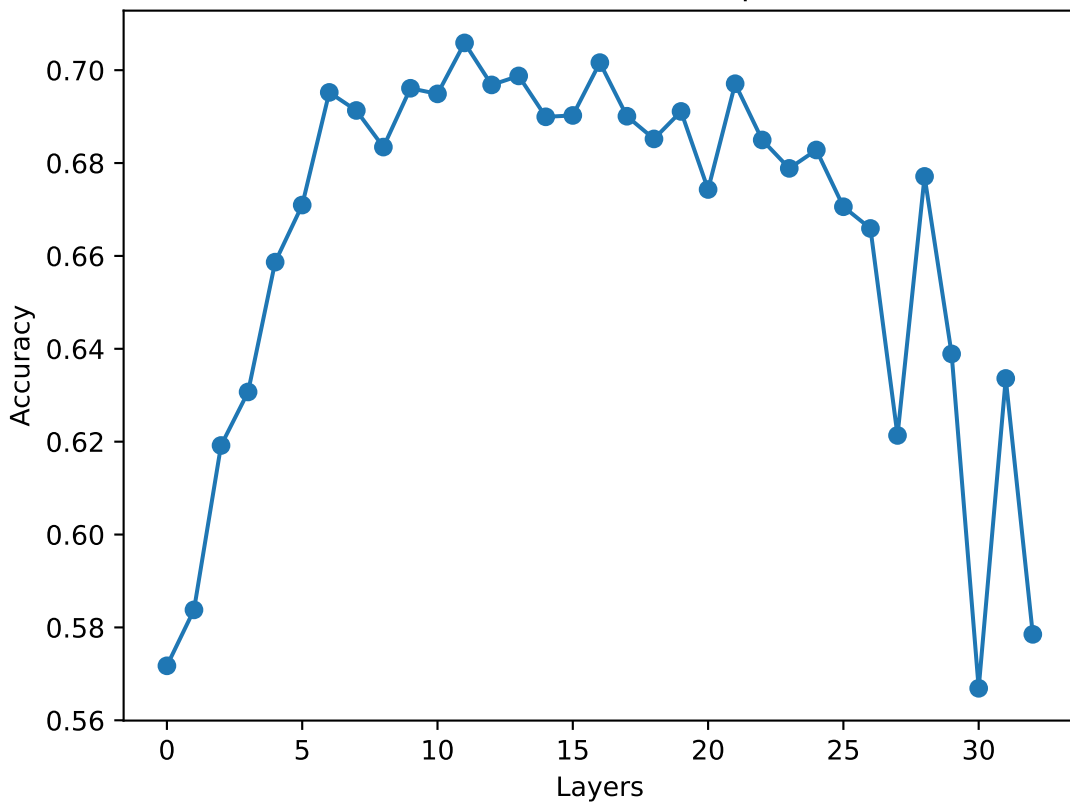

Supplement: supplementary_material [file attachment]

Number of few shot examples = 2

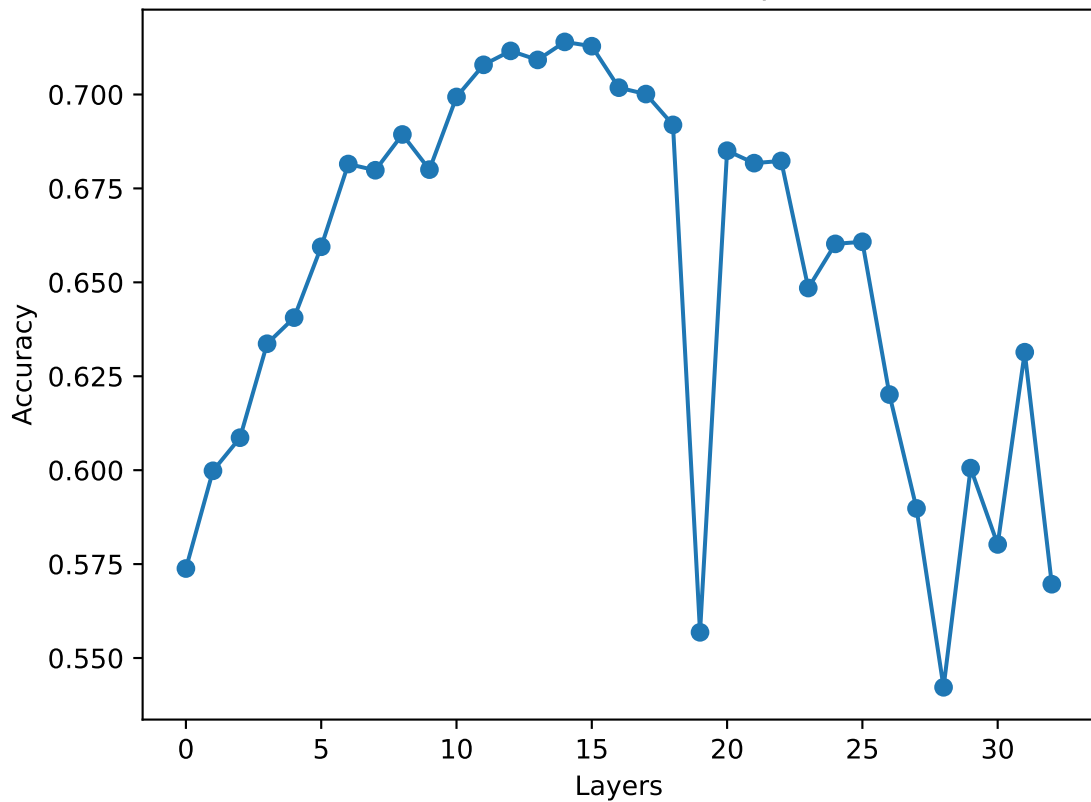

Supplement: supplementary_material [file attachment]

Number of few shot examples = 4

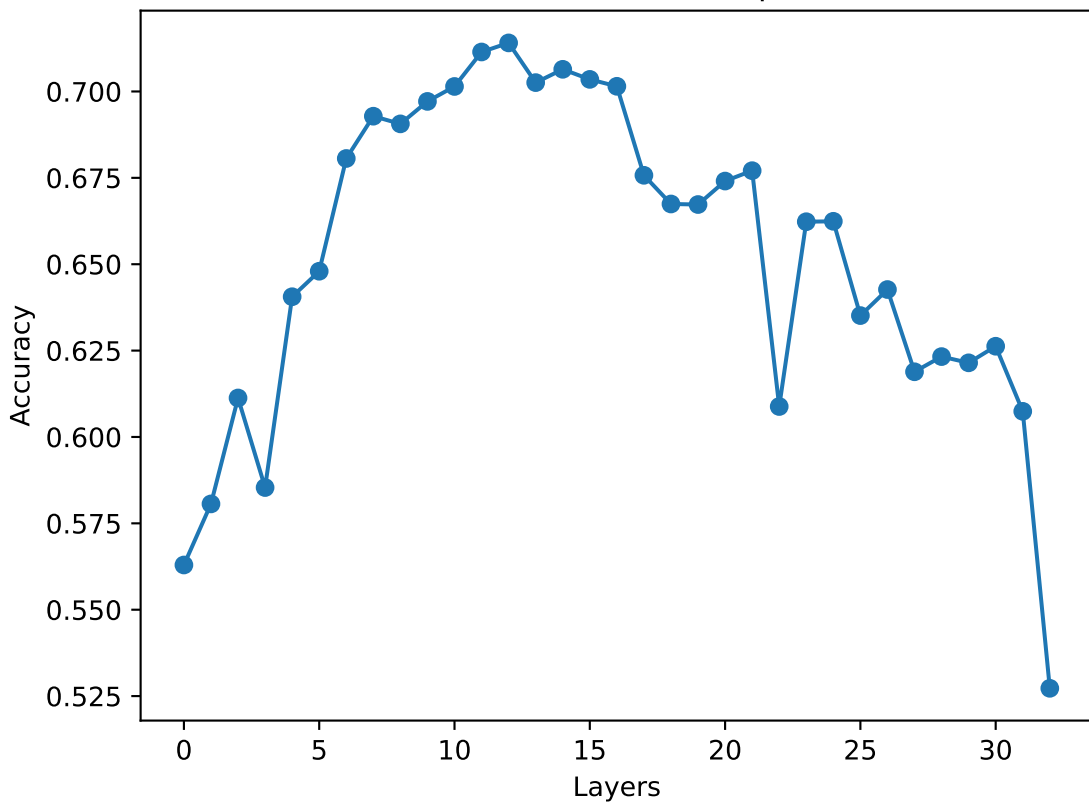

Supplement: supplementary_material [file attachment]
